# Supplementary material
Source: MDPI journal article supplement (https://www.mdpi.com/2071-1050/14/8/4425)
Supplement: s1 [file s1]

## **Supplementary material**

### **Plastic waste management in India: Challenges, opportunities, and roadmap for circular economy**

**Rumana Hossain <sup>1,\*</sup>, Md Tasbirul Islam <sup>1</sup>, Riya Shanker <sup>2</sup>, Debishree Khan <sup>2</sup>, Katherine Elizabeth Sarah Locock<sup>3</sup>, Anirban Ghose <sup>1</sup>, Heinz Schandl <sup>4</sup>, Rita Dhodapkar <sup>2</sup> and Veena Sahajwalla <sup>1</sup>**

<sup>1</sup> Centre for Sustainable Materials Research and Technology, SMaRT@UNSW, School of Materials Science and Engineering, The University of New South Wales (UNSW), Sydney, NSW 2052, Australia; md\_tasbirul.islam@unsw.edu.au (M.T.I.); a.ghose@unsw.edu.au (A.G.); veena@unsw.edu.au (V.S.)

<sup>2</sup> Director's Research Cell, CSIR-National Environmental Engineering Research Institute, Nehru Marg, Nagpur 440 020, India; riyashanker1997@gmail.com (R.S.); k.debishree@neeri.res.in (D.K.); rs\_dhodapkar@neeri.res.in (R.D.)

<sup>3</sup> Commonwealth Scientific and Industrial Research Organisation (CSIRO), Australian Manufacturing and Materials Precinct, Clayton, VIC 3168, Australia; katherine.locock@csiro.au

<sup>4</sup> Commonwealth Scientific and Industrial Research Organisation (CSIRO), Black Mountain Science and Innovation Park, Acton, ACT 2601, Australia; heinz.schandl@csiro.au

## **Tables**

**Table S1.** Summary of review articles published from India (2005-March 2021).

| Topic                                                                                                     | References |
|-----------------------------------------------------------------------------------------------------------|------------|
| Biodegradable polymer/biopolymer application and sustainable design                                       | [1-23]     |
| Benchmarking of bioplastics                                                                               | [24]       |
| Separation of lactic acid (as a main constituents of biopolymer)                                          | [25]       |
| Impact of COVID 19 on PW management                                                                       | [26]       |
| Application of PW composite in construction                                                               | [27-29]    |
| Hybrid bio composite development                                                                          | [30,31]    |
| Effect of biotechnological and molecular technology (microbial routes) in plastic degradation             | [32-51],   |
| Properties of thermoplastics and rubber and their application as encapsulation (in product manufacturing) | [52,53]    |
| Sustainable alternative sources for plastic production                                                    | [54]       |
| Application of azo dye in plastics for enhanced biodegradability                                          | [55,56]    |
| Circular economy and plastic pollution from G20 policy perspectives                                       | [57]       |
| Plastic pollution in coastal marine environment                                                           | [58]       |
| Policy perspectives of marine plastics pollution in the Bay of Bengal areas                               | [59]       |
| Microplastic pollution                                                                                    | [60-65]    |

|                                                                           |          |
|---------------------------------------------------------------------------|----------|
| Bioaugmentation of PWs in landfills and oceans                            | [66]     |
| Development of index for handling and recycling of PW                     | [67]     |
| Enzymatic remediation of Polyethylene Terephthalate (PET) PW              | [68]     |
| Challenges and solutions for single use plastics for food packaging       | [69]     |
| Manufacturing techniques and application of polymer matrix composites     | [70]     |
| Pyrolysis-oriented and catalyst applications in fuel production from PW   | [71-76]  |
| Waste plastic derived fuel in diesel engine                               | [77-81], |
| Edible film production                                                    | [82]     |
| Biodiesel production from PW                                              | [83]     |
| application of PW in concrete production                                  | [84-86]  |
| Chitin for packaging materials                                            | [87]     |
| Pyrolysis and gasification of PW                                          | [88]     |
| Chemical processing of PVC                                                | [89]     |
| Recycling of polystyrene                                                  | [90]     |
| Tertiary recycling of HDPE                                                | [91]     |
| Degradation of PE                                                         | [92]     |
| Wood polymer composite processing, properties and applications            | [93]     |
| Health impact of bisphenol A and its biosensing                           | [94-97]  |
| Human health impacts due to plastics, health management practices and EPR | [97,98]  |
| Biodegradability of blended polymers                                      | [99]     |
| Separation and conversion of PW from municipal solid waste (MSW)          | [100]    |
| Processing techniques of polymer reinforced composites                    | [101]    |
| Hydrogen and carbon nanotube production from PW                           | [102]    |
| Hydrogen production from biopolymer                                       | [103]    |
| pyrolysis for energy recovery                                             | [79]     |
| Chemical recycling method for fiber reinforced plastics                   | [104]    |
| Recycled polymer application in mineral and metallurgical processing      | [105]    |
| Recycling of polystyrene based plastics                                   | [106]    |
| Biomaterial application in engineering                                    | [107]    |
| Waste plastics application in automobile sector                           | [108]    |
| Development circumstances of plastic recycling industry                   | [109]    |

**Table S2.** Plastic use in various components in automobile [110]

| Component               | Main types of plastics     |
|-------------------------|----------------------------|
| Bumpers                 | PS, ABS, PC/PBT, PP        |
| Seats                   | PUR, PP, PVC, ABS, PA      |
| Dashboard               | PP, ABS, SMA, PPE, PC      |
| Fuel systems            | HDPE, POM, PA, PP, PBT     |
| Body (including panels) | PP, PPE, UP                |
| Under bonnet components | PA, PP, PBT                |
| Interior trim           | PP, ABS, PET, POM, PVC     |
| Electrical components   | PP, PE, PBT, PA, PVC       |
| Exterior trim           | ABS, PA, PBT, POM, ASA, PP |
| Lighting                | PC, PBT, ABS, PMMA, UP     |
| Upholstery              | PVC, PUR, PP, PE           |
| Liquid reservoir        | PP, PE, PA                 |

**Table S3.** Indian states contributing towards addition of PW into Ganges River [59]

| Indian States | Consumption/year                | PW Management                                                 | Ban/Partially Ban                                                                                                                                           |
|---------------|---------------------------------|---------------------------------------------------------------|-------------------------------------------------------------------------------------------------------------------------------------------------------------|
| Uttarakhand   | 3016.3ton/annum<br>2015/16      | Information on PW management and compliance is not available. | A complete ban on the use of plastic carrier bags.                                                                                                          |
| Uttar Pradesh | 152492.65 tons/annum<br>2016/17 | NA                                                            | A complete ban on the manufacture, import, storage, transportation, sale, and use of plastic carry bags in this State. A complete ban on plastic carry bags |
| Bihar         | 2280 tons/annum<br>2016/17      | Information on PW management not available                    | Partial Ban                                                                                                                                                 |
| Jharkhand     | 35,853 tones/annum, 2015-16     | Information on PW management not available                    | Partial Ban                                                                                                                                                 |

**Table S4** The types of plastics generated and produced in India

| Application of plastics               | Type of plastics                    |
|---------------------------------------|-------------------------------------|
| Packaging -Flexible, Rigid and Others | PP, PE, PVC, PS, PL, PA, PET, Nylon |

|                            |                                   |
|----------------------------|-----------------------------------|
| Infrastructure             | HDPE, LDPE, PP, PS, PET, PC       |
| Automotive                 | PC, PP, PVC, PS, PE, PET          |
| Biomedical                 | PVC, PP, PE, PS, PET              |
| Electrical and Electronics | ABS, PVC, LDPE, HDPE, PE, PP, PS, |

## Figures

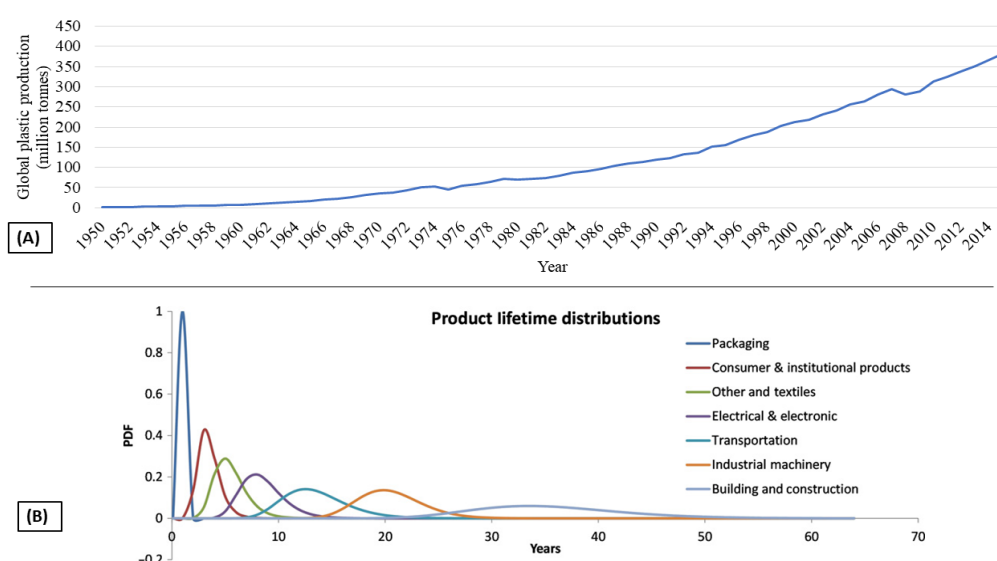

**Figure S1** (A) Global plastic production from 1950-2014 [111] and (B) plastic-related product lifespan distribution in various sectors, adapted from Geyer, *et al.* [112].

1. Rai, P.; Mehrotra, S.; Priya, S.; Gnansounou, E.; Sharma, S.K. Recent advances in the sustainable design and applications of biodegradable polymers. *Bioresource Technology* **2021**, 124739.
2. Bhargava, N.; Sharanagat, V.S.; Mor, R.S.; Kumar, K. Active and intelligent biodegradable packaging films using food and food waste-derived bioactive compounds: A review. *Trends in Food Science Technology* **2020**, 105, 385-401.
3. Sirohi, R.; Gaur, V.K.; Pandey, A.K.; Sim, S.J.; Kumar, S. Harnessing fruit waste for poly-3-hydroxybutyrate production: A review. *Bioresource Technology* **2021**, 124734.
4. Tripathi, A.D.; Paul, V.; Agarwal, A.; Sharma, R.; Hashempour-Baltork, F.; Rashidi, L.; Darani, K.K. Production of Polyhydroxyalkanoates Using Dairy Processing Waste-A review. *Bioresource Technology* **2021**, 124735.
5. Balda, S.; Sharma, A.; Capalash, N.; Sharma, P. Banana fibre: a natural and sustainable bioresource for eco-friendly applications. *Clean Technologies and Environmental Policy* **2021**, 1-13.

6. Prajapati, K.; Nayak, R.; Shukla, A.; Parmar, P.; Goswami, D.; Saraf, M. Polyhydroxyalkanoates: An Exotic Gleam in the Gloomy Tale of Plastics. *Journal of Polymers and the Environment* **2021**, 1-20.
7. Assad, I.; Bhat, S.U.; Gani, A.; Shah, A. Protein based packaging of plant origin: Fabrication, properties, recent advances and future perspectives. *International Journal of Biological Macromolecules* **2020**, 164, 707-716.
8. Sehgal, R.; Gupta, R. Polyhydroxyalkanoate and its efficient production: an eco-friendly approach towards development. *3 Biotech* **2020**, 10, 1-14.
9. Rawoof, S.A.A.; Kumar, P.S.; Vo, D.-V.N.; Devaraj, K.; Mani, Y.; Devaraj, T.; Subramanian, S. Production of optically pure lactic acid by microbial fermentation: a review. *Environmental Chemistry Letters* **2020**, 1-18.
10. Sirohi, R.; Pandey, J.P.; Gaur, V.K.; Gnansounou, E.; Sindhu, R. Critical overview of biomass feedstocks as sustainable substrates for the production of polyhydroxybutyrate (PHB). *Bioresource Technology* **2020**, 123536.
11. Kumar, M.; Rathour, R.; Singh, R.; Sun, Y.; Pandey, A.; Gnansounou, E.; Lin, K.-Y.A.; Tsang, D.C.; Thakur, I.S. Bacterial polyhydroxyalkanoates: Opportunities, challenges, and prospects. *Journal of Cleaner Production* **2020**, 121500.
12. Kabir, E.; Kaur, R.; Lee, J.; Kim, K.-H.; Kwon, E.E. Prospects of biopolymer technology as an alternative option for non-degradable plastics and sustainable management of plastic wastes. *Journal of Cleaner Production* **2020**, 258, 120536.
13. Sabapathy, P.C.; Devaraj, S.; Meixner, K.; Anburajan, P.; Kathirvel, P.; Ravikumar, Y.; Zayed, H.M.; Qi, X. Recent developments in Polyhydroxyalkanoates (PHAs) production—A review. *Bioresource Technology* **2020**, 306, 123132.
14. Jha, A.; Kumar, A. Biobased technologies for the efficient extraction of biopolymers from waste biomass. *Bioprocess and Biosystems Engineering* **2019**, 42, 1893-1901.
15. Kumar, A.; Thakur, A.; Panesar, P.S. Lactic acid and its separation and purification techniques: A review. *Reviews in Environmental Science and Bio/Technology* **2019**, 18, 823-853.
16. Tsang, Y.F.; Kumar, V.; Samadar, P.; Yang, Y.; Lee, J.; Ok, Y.S.; Song, H.; Kim, K.-H.; Kwon, E.E.; Jeon, Y.J. Production of bioplastic through food waste valorization. *Environment International* **2019**, 127, 625-644.
17. Al-Battashi, H.S.; Annamalai, N.; Sivakumar, N.; Al-Bahry, S.; Tripathi, B.N.; Nguyen, Q.D.; Gupta, V.K. Lignocellulosic biomass (LCB): a potential alternative biorefinery feedstock for polyhydroxyalkanoates production. *Reviews in Environmental Science Bio/Technology* **2019**, 18, 183-205.
18. Thakur, S.; Chaudhary, J.; Sharma, B.; Verma, A.; Tamulevicius, S.; Thakur, V.K. Sustainability of bioplastics: Opportunities and challenges. *Current opinion in Green and Sustainable Chemistry* **2018**, 13, 68-75.
19. Kavitha, G.; Rengasamy, R.; Inbakandan, D. Polyhydroxybutyrate production from marine source and its application. *International journal of Biological Macromolecules* **2018**, 111, 102-108.
20. Kaur, L.; Khajuria, R.; Parihar, L.; Singh, G.D. Polyhydroxyalkanoates: biosynthesis to commercial production-A review. *Journal of Microbiology, Biotechnology and Food Sciences* **2021**, 2021, 1098-1106.
21. Balaji, S.; Gopi, K.; Muthuvelan, B. A review on production of poly  $\beta$  hydroxybutyrates from cyanobacteria for the production of bio plastics. *Algal Research* **2013**, 2, 278-285.
22. Nampoothiri, K.M.; Nair, N.R.; John, R.P. An overview of the recent developments in polylactide (PLA) research. *Bioresource Technology* **2010**, 101, 8493-8501.

23. Kalia, V.; Raizada, N.; Sonakya, V. Bioplastics. Available online: [http://nopr.niscair.res.in/bitstream/123456789/26582/1/JSIR%2059\(6\)%20433-445.pdf](http://nopr.niscair.res.in/bitstream/123456789/26582/1/JSIR%2059(6)%20433-445.pdf) (accessed on 31 March 2021).
24. Bhagwat, G.; Gray, K.; Wilson, S.P.; Muniyasamy, S.; Vincent, S.G.T.; Bush, R.; Palanisami, T. Benchmarking bioplastics: A natural step towards a sustainable future. *Journal of Polymers and the Environment* **2020**, *28*, 3055–3075.
25. Wasewar, K.L. Separation of Lactic Acid: Recent Advances. *Chem. Biochem. Eng. Q* **2005**, *19*, 159–172.
26. Parashar, N.; Hait, S. Plastics in the time of COVID-19 pandemic: Protector or polluter? *Science of The Total Environment* **2021**, *759*, 144274, doi:<https://doi.org/10.1016/j.scitotenv.2020.144274>.
27. Mohan, H.T.; Jayanarayanan, K.; Mini, K.J.C.; Materials, B. Recent trends in utilization of plastics waste composites as construction materials. **2020**, 121520.
28. Shyamala, G.; Kumar, K.R.; Olalusi, O.B. Impacts of nonconventional construction materials on concrete strength development: case studies. *SN Applied Sciences* **2020**, *2*, 1–11.
29. Goli, V.S.N.S.; Mohammad, A.; Singh, D.N. Application of municipal plastic waste as a manmade neo-construction material: issues & way forward. *Resources, Conservation and Recycling* **2020**, *161*, 105008.
30. Mohanty, A.K.; Vivekanandhan, S.; Pin, J.-M.; Misra, M. Composites from renewable and sustainable resources: Challenges and innovations. *Science* **2018**, *362*, 536–542.
31. Mohit, H.; Arul Mozhi Selvan, V. A comprehensive review on surface modification, structure interface and bonding mechanism of plant cellulose fiber reinforced polymer based composites. *Composite Interfaces* **2018**, *25*, 629–667.
32. Priya, A.; Dutta, K.; Daverey, A. A comprehensive biotechnological and molecular insight into plastic degradation by microbial community. *Journal of Chemical Technology & Biotechnology* **2021**.
33. Purohit, J.; Chattopadhyay, A.; Teli, B. Metagenomic exploration of plastic degrading microbes for biotechnological application. *Current Genomics* **2020**, *21*, 253–270.
34. Anjana, K.; Hinduja, M.; Sujitha, K.; Dharani, G. Review on plastic wastes in marine environment—Biodegradation and biotechnological solutions. *Marine Pollution Bulletin* **2020**, *150*, 110733.
35. Sharma, M.; Akhter, Y.; Chatterjee, S.J.W.J.o.M.; Biotechnology. A review on remediation of cyanide containing industrial wastes using biological systems with special reference to enzymatic degradation. *World Journal of Microbiology and Biotechnology* **2019**, *35*, 1–14.
36. Singh, P.; Kumar, R. Critical review of microbial degradation of aromatic compounds and exploring potential aspects of Furfuryl alcohol degradation. *Journal of Polymers and the Environment* **2019**, *27*, 901–916.
37. Moharir, R.V.; Kumar, S. Challenges associated with plastic waste disposal and allied microbial routes for its effective degradation: a comprehensive review. *Journal of Cleaner Production* **2019**, *208*, 65–76.
38. Sathya, A.; Sivasubramanian, V.; Santhiagu, A.; Sebastian, C.; Sivashankar, R. Production of polyhydroxyalkanoates from renewable sources using bacteria. *Journal of Polymers and the Environment* **2018**, *26*, 3995–4012.
39. Koshti, R.; Mehta, L.; Samarth, N.J.J.o.P.; Environment, t. Biological recycling of polyethylene terephthalate: A mini-review. *Journal of Polymers and the Environment* **2018**, *26*, 3520–3529.
40. Thakur, I.S.; Kumar, M.; Varjani, S.J.; Wu, Y.; Gnansounou, E.; Ravindran, S. Sequestration and utilization of carbon dioxide by chemical and biological methods for biofuels and biomaterials by chemoautotrophs: opportunities and challenges. *Bioresource Technology* **2018**, *256*, 478–490.
41. Zaheer, M.R.; Kuddus, M. PHB (poly- $\beta$ -hydroxybutyrate) and its enzymatic degradation. *Polymers for Advanced Technologies* **2018**, *29*, 30–40.

42. Singh, A.; Singh, A.K. Haloarchaea: worth exploring for their biotechnological potential. *Biotechnology letters* **2017**, *39*, 1793-1800.
43. Elsayy, M.A.; Kim, K.-H.; Park, J.-W.; Deep, A. Hydrolytic degradation of polylactic acid (PLA) and its composites. *Renewable and Sustainable Energy Reviews* **2017**, *79*, 1346-1352.
44. Pathak, V.M. Review on the current status of polymer degradation: a microbial approach. *Bioresources and Bioprocessing* **2017**, *4*, 1-31.
45. Sen, S.K.; Raut, S. Microbial degradation of low density polyethylene (LDPE): A review. *Journal of Environmental Chemical Engineering* **2015**, *3*, 462-473.
46. Kale, S.K.; Deshmukh, A.G.; Dudhare, M.S.; Patil, V.B. Microbial degradation of plastic: a review. *Journal of Biochemical Technology* **2015**, *6*, 952-961.
47. Mahajan, N.; Gupta, P. New insights into the microbial degradation of polyurethanes. *RSC Advances* **2015**, *5*, 41839-41854.
48. Shah, A.A.; Kato, S.; Shintani, N.; Kamini, N.R.; Nakajima-Kambe, T. Microbial degradation of aliphatic and aliphatic-aromatic co-polyesters. *Applied microbiology and Biotechnology* **2014**, *98*, 3437-3447.
49. Singh, B.; Sharma, N. Mechanistic implications of plastic degradation. *Polymer Degradation and Stability* **2008**, *93*, 561-584.
50. Artham, T.; Doble, M. Biodegradation of aliphatic and aromatic polycarbonates. *Macromolecular Bioscience* **2008**, *8*, 14-24.
51. Panda, T.; Gowrishankar, B.J.A.m.; biotechnology. Production and applications of esterases. *Applied Microbiology and Biotechnology* **2005**, *67*, 160-169.
52. Mohite, A.S.; Rajpurkar, Y.D.; More, A.P. Bridging the gap between rubbers and plastics: a review on thermoplastic polyolefin elastomers. *Polymer Bulletin* **2021**, 1-35.
53. Rajeev, R.; De, S. Thermoplastic elastomers based on waste rubber and plastics. *Rubber Chemistry and Technology* **2004**, *77*, 569-578.
54. Deshwal, G.K.; Alam, T.; Panjagari, N.R.; Bhardwaj, A.J.J.o.P.; Environment, t. Utilization of Cereal Crop Residues, Cereal Milling, Sugarcane and Dairy Processing By-Products for Sustainable Packaging Solutions. *Journal of Polymers and the Environment* **2021**, 1-16, doi:<https://doi.org/10.1007/s13197-020-04885-6>.
55. Selvaraj, V.; Karthika, T.S.; Mansiya, C.; Alagar, M. An over review on recently developed techniques, mechanisms and intermediate involved in the advanced azo dye degradation for industrial applications. *Journal of Molecular Structure* **2020**, 129195.
56. Popli, S.; Patel, U.D. Destruction of azo dyes by anaerobic-aerobic sequential biological treatment: a review. *International Journal of Environmental Science and Technology* **2015**, *12*, 405-420.
57. Fadeeva, Z.; Van Berkel, R. Unlocking circular economy for prevention of marine plastic pollution: An exploration of G20 policy and initiatives. *Journal of Environmental Management* **2021**, *277*, 111457.
58. Nammalwar, P. Plastics pollution in coastal marine environment - A review. *EVERYMANS SCIENCE* **2019**, *54*, 316-320.
59. Raha, U.K.; Kumar, B.R.; Sarkar, S.K. Policy Framework for Mitigating Land-based Marine Plastic Pollution in the Gangetic Delta Region of Bay of Bengal- A review. *Journal of Cleaner Production* **2021**, *278*, 123409, doi:<https://doi.org/10.1016/j.jclepro.2020.123409>.
60. Veerasingham, S.; Ranjani, M.; Venkatachalapathy, R.; Bagaev, A.; Mukhanov, V.; Litvinyuk, D.; Mugilarasan, M.; Gurumoorthi, K.; Gunganathan, L.; Aboobacker, V. Contributions of Fourier transform infrared spectroscopy in microplastic pollution research: A review. *Critical Reviews in Environmental Science and Technology* **2020**, 1-63.

61. Ajith, N.; Arumugam, S.; Parthasarathy, S.; Manupoori, S.; Janakiraman, S. Global distribution of microplastics and its impact on marine environment—a review. *Environmental Science and Pollution Research* **2020**, *27*, 25970-25986.
62. Laskar, N.; Kumar, U. Plastics and microplastics: A threat to environment. *Environmental Technology & Innovation* **2019**, *14*, 100352.
63. Rao, B.M. Microplastics in the aquatic environment implications for post-harvest fish quality. Available online: <http://drs.cift.res.in/handle/123456789/4213> (accessed on 31 March 2021).
64. Rezaia, S.; Park, J.; Din, M.F.M.; Taib, S.M.; Talaiekhosani, A.; Yadav, K.K.; Kamyab, H. Microplastics pollution in different aquatic environments and biota: A review of recent studies. *Marine pollution Bulletin* **2018**, *133*, 191-208.
65. Anbumani, S.; Kakkar, P. Ecotoxicological effects of microplastics on biota: a review. *Environmental Science and Pollution Research* **2018**, *25*, 14373-14396.
66. Sharma, B.; Jain, P. Deciphering the advances in bioaugmentation of plastic wastes. *Journal of Cleaner Production* **2020**, 123241.
67. Gopinath, K.P.; Nagarajan, V.M.; Krishnan, A.; Malolan, R. A critical review on the influence of energy, environmental and economic factors on various processes used to handle and recycle plastic wastes: Development of a comprehensive index. *Journal of Cleaner Production* **2020**, *274*, 123031.
68. Maurya, A.; Bhattacharya, A.; Khare, S.K.J.F.i.B.; Biotechnology. Enzymatic Remediation of Polyethylene Terephthalate (PET)–Based Polymers for Effective Management of Plastic Wastes: An Overview. *Frontiers in Bioengineering and Biotechnology* **2020**, *8*.
69. Dey, A.; Dhumal, C.V.; Sengupta, P.; Kumar, A.; Pramanik, N.K.; Alam, T. Challenges and possible solutions to mitigate the problems of single-use plastics used for packaging food items: a review. *Journal of Food Science and Technology* **2020**, doi:10.1007/s13197-020-04885-6.
70. Chohan, J.S.; Boparai, K.S.; Singh, R.; Hashmi, M. Manufacturing techniques and applications of polymer matrix composites: a brief review. *Advances in Materials Processing Technologies* **2020**, 1-11.
71. Murthy, K.; Shetty, R.J.; Shiva, K. Plastic waste conversion to fuel: a review on pyrolysis process and influence of operating parameters. *Energy Sources, Part A: Recovery, Utilization, Environmental Effects* **2020**, 1-21.
72. Rajendran, K.M.; Chintala, V.; Sharma, A.; Pal, S.; Pandey, J.K.; Ghodke, P. Review of catalyst materials in achieving the liquid hydrocarbon fuels from municipal mixed plastic waste (MMPW). *Materials Today Communications* **2020**, *24*, 100982.
73. Kasar, P.; Sharma, D.; Ahmaruzzaman, M. Thermal and catalytic decomposition of waste plastics and its co-processing with petroleum residue through pyrolysis process. *Journal of Cleaner Production* **2020**, 121639.
74. Banu, J.R.; Sharmila, V.G.; Ushani, U.; Amudha, V.; Kumar, G. Impervious and influence in the liquid fuel production from municipal plastic waste through thermo-chemical biomass conversion technologies-A review. *Science of the Total Environment* **2020**, *718*, 137287.
75. Mohanraj, C.; Senthilkumar, T.; Chandrasekar, M. A review on conversion techniques of liquid fuel from waste plastic materials. *International Journal of Energy Research* **2017**, *41*, 1534-1552.
76. Panda, A.K.; Singh, R.K.; Mishra, D. Thermolysis of waste plastics to liquid fuel: A suitable method for plastic waste management and manufacture of value added products—A world prospective. *Renewable and Sustainable Energy Reviews* **2010**, *14*, 233-248.
77. Pakiya Pradeep, A.; Gowthaman, S.J.I.J.o.A.E. Combustion and emission characteristics of diesel engine fuelled with waste plastic oil—a review. *International Journal of Ambient Energy* **2019**, 1-19.



78. Damodharan, D.; Kumar, B.R.; Gopal, K.; De Pours, M.V.; Sethuramasamyraja, B. Utilization of waste plastic oil in diesel engines: a review. *Reviews in Environmental Science and Bio/Technology* **2019**, *18*, 681-697.
79. Dwivedi, P.; Mishra, P.; Mondal, M.K.; Srivastava, N. Non-biodegradable polymeric waste pyrolysis for energy recovery. *Heliyon* **2019**, *5*, e02198.
80. Ragupathi, K.; Mani, I. Durability and lube oil contamination study on diesel engine fueled with various alternative fuels: A review. *Energy Sources, Part A: Recovery, Utilization, Environmental Effects* **2021**, *43*, 932-943.
81. Gomathi, N.; Rupesh, P. Study On the Performance of Plastic Waste Oil in CI Engines: A Review. *Research Journal of Pharmaceutical Biological Chemical Sciences* **2016**, *7*, 1689-1696.
82. Dinika, I.; Verma, D.K.; Balia, R.; Utama, G.L.; Patel, A.R. Potential of cheese whey bioactive proteins and peptides in the development of antimicrobial edible film composite: A review of recent trends. *Trends in Food Science Technology* **2020**.
83. Subramaniam, D.; Murugesan, A.; Avinash, A.; Kumaravel, A.J.R.; reviews, s.e. Bio-diesel production and its engine characteristics—An expatiate view. *Renewable & Sustainable Energy Reviews* **2013**, *22*, 361-370.
84. Tiwari, A.; Singh, S.; Nagar, R. Feasibility assessment for partial replacement of fine aggregate to attain cleaner production perspective in concrete: a review. *Journal of Cleaner Production* **2016**, *135*, 490-507.
85. Sharma, R.; Bansal, P.P. Use of different forms of waste plastic in concrete—a review. *Journal of Cleaner Production* **2016**, *112*, 473-482.
86. Siddique, R.; Khatib, J.; Kaur, I. Use of recycled plastic in concrete: A review. *Waste Management* **2008**, *28*, 1835-1852.
87. Srinivasa, P.; Tharanathan, R. Chitin/chitosan—Safe, ecofriendly packaging materials with multiple potential uses. *Food Reviews International* **2007**, *23*, 53-72.
88. Dave, P.N.; Joshi, A.K. Plasma pyrolysis and gasification of plastics waste—a review. *NISCAIR Online Periodicals Repository* **2010**, *69*, 177-179.
89. Pant, D.; Singh, R.; Kumar, S. Management of waste poly vinyl chloride (PVC) through chemical modification. *NISCAIR Online Periodicals Repository* **2012**, *71*, 181-186.
90. Maharana, T.; Negi, Y.; Mohanty, B. Recycling of polystyrene. *Polymer-Plastics Technology and Engineering* **2007**, *46*, 729-736.
91. Kumar, S.; Panda, A.K.; Singh, R.K. A review on tertiary recycling of high-density polyethylene to fuel. *Resources, Conservation and Recycling* **2011**, *55*, 893-910.
92. Roy, P.K.; Hakkarainen, M.; Varma, I.K.; Albertsson, A.-C. Degradable polyethylene: fantasy or reality. *Environmental Science & Technology* **2011**, *45*, 4217-4227.
93. Khan, M.Z.R.; Srivastava, S.K.; Gupta, M. A state-of-the-art review on particulate wood polymer composites: Processing, properties and applications. *Polymer Testing* **2020**, 106721.
94. Abraham, A.; Chakraborty, P. A review on sources and health impacts of bisphenol A. *Reviews on Environmental Health* **2019**, *35*, 201-210.
95. Sinha, A.; Wu, L.; Lu, X.; Chen, J.; Jain, R. Advances in sensing and biosensing of bisphenols: a review. *Analytica chimica acta* **2018**, *998*, 1-27.
96. Chouhan, S.; Yadav, S.K.; Prakash, J.; Singh, S.P. Effect of Bisphenol A on human health and its degradation by microorganisms: a review. *Annals of Microbiology* **2014**, *64*, 13-21.
97. Husain, Q.; Qayyum, S. Biological and enzymatic treatment of bisphenol A and other endocrine disrupting compounds: a review. *Critical Reviews in Biotechnology* **2013**, *33*, 260-292.
98. Priyanka, M.; Dey, S. Ruminant impaction due to plastic materials—An increasing threat to ruminants and its impact on human health in developing countries. *Veterinary World* **2018**, *11*, 1307.

99. Makhijani, K.; Kumar, R.; Sharma, S.K. Biodegradability of blended polymers: A comparison of various properties. *Critical Reviews in Environmental Science and Technology* **2015**, *45*, 1801-1825.
100. Raj, B.; Kumar, J.; Rao, V.V.L.K. Plastic/packaging waste separation from MSW and its conversion and used as value-added products in different applications: An eco-sustainable approach. *NISCAIR Online Periodicals Repository* **2020**, *27*, 193-208.
101. Kumar, R.; Singh, R.; Ahuja, I.; Hashmi, M. Processing techniques of polymeric materials and their reinforced composites. *Advances in Materials and Processing Technologies* **2020**, *6*, 591-607.
102. Sharma, S.S.; Batra, V.S. Production of hydrogen and carbon nanotubes via catalytic thermo - chemical conversion of plastic waste. *Journal of Chemical Technology and Biotechnology* **2020**, *95*, 11-19.
103. Kumar, G.; Ponnusamy, V.K.; Bhosale, R.R.; Shobana, S.; Yoon, J.-J.; Bhatia, S.K.; Banu, J.R.; Kim, S.-H. A review on the conversion of volatile fatty acids to polyhydroxyalkanoates using dark fermentative effluents from hydrogen production. *Bioresource Technology* **2019**, *287*, 121427.
104. Gharde, S.; Kandasubramanian, B.J.E.T.; Innovation. Mechanochemical and chemical recycling methodologies for the Fibre Reinforced Plastic (FRP). *Environmental Technology & Innovation* **2019**, *14*, 100311.
105. Devasahayam, S.; Raman, R.K.; Chennakesavulu, K.; Bhattacharya, S. Plastics—Villain or Hero? Polymers and Recycled Polymers in Mineral and Metallurgical Processing—A Review. *Materials* **2019**, *12*, 655, doi:10.3390/ma12040655.
106. Thakur, S.; Verma, A.; Sharma, B.; Chaudhary, J.; Tamulevicius, S.; Thakur, V.K. Recent developments in recycling of polystyrene based plastics. *Current Opinion in Green and Sustainable Chemistry* **2018**, *13*, 32-38.
107. Mishra, R.K.; Ha, S.K.; Verma, K.; Tiwari, S.K. Recent progress in selected bio-nanomaterials and their engineering applications: an overview. *Journal of Science: Advanced Materials and Devices* **2018**, *3*, 263-288.
108. Bukkarapu, K.R.; Gangadhar, D.S.; Jyothi, Y.; Kanasani, P. Management, conversion, and utilization of waste plastic as a source of sustainable energy to run automotive: A review. *Energy Sources, Part A: Recovery, Utilization, Environmental Effects* **2018**, *40*, 1681-1692.
109. Unnisa, S.A.; Hassanpour, M. Development circumstances of four recycling industries (used motor oil, acidic sludge, plastic wastes and blown bitumen) in the world. *Renewable & Sustainable Energy Reviews* **2017**, *72*, 605-624.
110. UNIDO. RECYCLING OF PLASTICS IN INDIAN PERSPECTIVE. Available online: <https://www.unido.org/sites/default/files/files/2018-11/Plenary%202%20-%20Plastics%20-%20Mohanty.pdf> (accessed on 03 March 2021).
111. Ritchie, H.; Roser, M. Plastic pollution. Available online: <https://ourworldindata.org/plastic-pollution> (accessed on 31 March 2021).
112. Geyer, R.; Jambeck, J.R.; Law, K.L. Production, use, and fate of all plastics ever made. *Science Advances* **2017**, *3*, e1700782.
